# Supplementary material for: Walkability and its association with prevalent and incident diabetes among adults in different regions of Germany: results of pooled data from five German cohorts
Source: PubMed Central journal article supplement (PMC6958624; doi:10.1186/s12902-019-0485-x), 2020-01-13
Supplement: 12902_2019_485_MOESM1_ESM.pdf [file 12902_2019_485_MOESM1_ESM.pdf]

## Additional file

**Table 1. Association between walkability and T2D by age group.**

|                                                                                                                                                                                                                                                                                                                                                                                                                                                                              | Prevalent T2D |      |            | Incident T2D |      |            |
|------------------------------------------------------------------------------------------------------------------------------------------------------------------------------------------------------------------------------------------------------------------------------------------------------------------------------------------------------------------------------------------------------------------------------------------------------------------------------|---------------|------|------------|--------------|------|------------|
|                                                                                                                                                                                                                                                                                                                                                                                                                                                                              | n             | RR   | 95 % CI    | n            | RR   | 95 % CI    |
| <b>Impedance</b>                                                                                                                                                                                                                                                                                                                                                                                                                                                             |               |      |            |              |      |            |
| 20 - 40 years                                                                                                                                                                                                                                                                                                                                                                                                                                                                | 3013          | 1.01 | 0.71, 1.44 | 2286         | 1.20 | 0.97, 1.48 |
| 41 - 60 years                                                                                                                                                                                                                                                                                                                                                                                                                                                                | 6900          | 0.92 | 0.83, 1.02 | 5709         | 0.94 | 0.85, 1.03 |
| over 61 years                                                                                                                                                                                                                                                                                                                                                                                                                                                                | 6095          | 1.07 | 1.00, 1.14 | 4110         | 1.02 | 0.94, 1.12 |
| <b>Transit stations</b>                                                                                                                                                                                                                                                                                                                                                                                                                                                      |               |      |            |              |      |            |
| 20 - 40 years                                                                                                                                                                                                                                                                                                                                                                                                                                                                | 3013          | 1.17 | 0.81, 1.69 | 2286         | 0.78 | 0.55, 1.11 |
| 41 - 60 years                                                                                                                                                                                                                                                                                                                                                                                                                                                                | 6900          | 1.10 | 0.98, 1.23 | 5709         | 1.10 | 0.99, 1.22 |
| over 60 years                                                                                                                                                                                                                                                                                                                                                                                                                                                                | 6095          | 1.00 | 0.93, 1.09 | 4110         | 1.05 | 0.95, 1.16 |
| <b>Points of interest</b>                                                                                                                                                                                                                                                                                                                                                                                                                                                    |               |      |            |              |      |            |
| 20 - 40 years                                                                                                                                                                                                                                                                                                                                                                                                                                                                | 3013          | 1.15 | 0.82, 1.62 | 2286         | 0.85 | 0.66, 1.11 |
| 41 - 60 years                                                                                                                                                                                                                                                                                                                                                                                                                                                                | 6900          | 1.15 | 1.05, 1.28 | 5709         | 1.03 | 0.94, 1.13 |
| over 60 years                                                                                                                                                                                                                                                                                                                                                                                                                                                                | 6095          | 1.01 | 0.94, 1.08 | 4110         | 1.02 | 0.94, 1.12 |
| Adjusted models are controlled for sex, education, and cohort. T2D, type 2 diabetes; RR, relative risk; CI, confidence interval. RR are from modified Poisson regression models and reported per 1 standard deviation of walkability measures. RR over 1 indicate higher risk of T2D in areas with more transit stations and POI (indicators of better walkability). RR over 1 indicate higher risk of T2D in areas with higher impedance (indicator of poorer walkability). |               |      |            |              |      |            |

**Table 2. Association between walkability and T2D adjusted for practicing sports.**

|                                                                                                                                                                                                                                                                                                                                                                                                                                                                                                                  | Prevalent T2D (n=15919) |            | Incident T2D (n = 12040) |            |
|------------------------------------------------------------------------------------------------------------------------------------------------------------------------------------------------------------------------------------------------------------------------------------------------------------------------------------------------------------------------------------------------------------------------------------------------------------------------------------------------------------------|-------------------------|------------|--------------------------|------------|
|                                                                                                                                                                                                                                                                                                                                                                                                                                                                                                                  | RR                      | 95 % CI    | RR                       | 95 % CI    |
| Impedance                                                                                                                                                                                                                                                                                                                                                                                                                                                                                                        | 1.02                    | 0.97, 1.08 | 1.00                     | 0.94, 1.07 |
| Transit stations                                                                                                                                                                                                                                                                                                                                                                                                                                                                                                 | 1.03                    | 0.96, 1.10 | 1.05                     | 0.98, 1.13 |
| POI                                                                                                                                                                                                                                                                                                                                                                                                                                                                                                              | 1.05                    | 0.99, 1.11 | 1.01                     | 0.95, 1.08 |
| Adjusted models are controlled for sex, age at baseline, education, practicing sports, and cohort. T2D, type 2 diabetes; RR, relative risk; CI, confidence interval. RR are from modified Poisson regression models and reported per 1 standard deviation of walkability measures. RR over 1 indicate higher risk of T2D in areas with more transit stations and POI (indicators of better walkability). RR over 1 indicate higher risk of T2D in areas with higher impedance (indicator of poorer walkability). |                         |            |                          |            |
